# Supplementary material
Source: publisher site journal article supplement (https://www.spandidos-publications.com/7987/downloadSupplementary)
Supplement: Supplementary file 1 [file downloadSupplementary]

## Sheet: details of outcomes variables
Details of outcomes variables
First author	Sample size	ABL		BVF		TMD		P1NP		OCN		TRAP5b (serum)		(Refs.)
		EX	CON	EX	CON	EX	CON	EX	CON	EX	CON	EX	CON
Taut et al	16	1.01±0.12	1.21±0.11	37±1.5	31±2.1	0.366±0.015	0.312±0.022	60.2±3.5	61.5±4.3	83.8±7.9	72.2±4.1	3.65±0.18	3.81±0.15	(42)
Ren et al	16	0.63±0.08	1.19±0.11											(41)
Chen et al	20	0.86±0.08	1.04±0.11	67.8±2.5	51.9±4.4	0.671±0.062	0.478±0.091			125±18	76±2.3	0.85±0.07	3.91±0.26	(37)
Hadaya et al	40	0.125±0.031	0.395±0.057					19.84±0.64	12.8±0.54					(38)
Yang et al	20	1.1828±0.0598	1.224±0.0629											(43)
Yiğit et al (LDD)	20	0.6±0.12	0.83±0.24											(44)
Yiğit et al (CAPE)	20	0.42±0.14	0.83±0.24											(44)
Kim et al	16	0.683±0.091	1.05±0.077											(39)
Ozaki et al	14	0.093±0.05	1.119±0.02	49.4±4.5	42.5±8.3									(40)
